# Supplementary material
Source: Springer Nature journal article supplement (https://www.springermedizin.de/resource/supplementary/12885_2012_4027_MOESM14_ESM.pdf/9465002)

# A Carmine Alum Whole Mounts

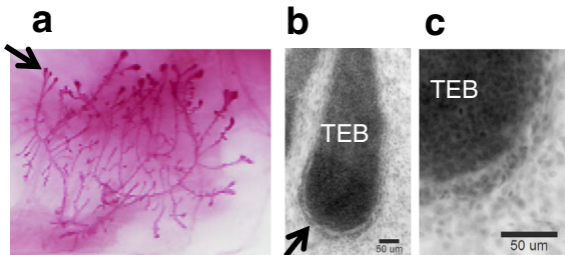

# Live Tissue

**B**

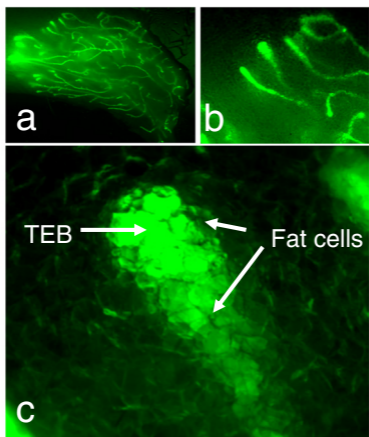

Supplement: MOESM14 [file 9465002]
